# Supplementary material for: Head and Neck Cancer Types and Risks of Cervical–Cranial Vascular Complications within 5 Years after Radiation Therapy
Source: MDPI journal article supplement (doi:10.3390/jpm12071060), 2022-06-29
Supplement: s1 [file s1]

**Supplementary Table S1.** Associated factors of significant CAS in Cox regression models

| Variable                 | <i>Univariate</i> |              |                 | <i>Multi-variables</i> |              |                 |
|--------------------------|-------------------|--------------|-----------------|------------------------|--------------|-----------------|
|                          | Crude HR          | 95% CI of HR | <i>p</i> -value | Adjusted HR            | 95% CI of HR | <i>p</i> -value |
| Nasopharyngeal carcinoma | 0.10              | 0.02-0.43    | 0.002           | 0.17                   | 0.05-0.57    | 0.004           |
| Re-irradiation           | 3.32              | 0.58-19.09   | 0.18            | 5.95                   | 1.25-28.29   | 0.03            |
| Glycated hemoglobin      | 1.03              | 1.00-1.07    | 0.03            | 1.03                   | 1.01-1.06    | 0.01            |
| Proton beam therapy      | 1.30              | 0.39-4.38    | 0.67            |                        |              |                 |
| Coronary artery disease  | 11.42             | 0.85-153.03  | 0.07            |                        |              |                 |
| Hypertension             | 0.24              | 0.08-0.72    | 0.01            |                        |              |                 |
| Smoking                  | 0.62              | 0.22-1.81    | 0.38            |                        |              |                 |
| Diabetes mellitus        | 0.57              | 0.12-2.58    | 0.46            |                        |              |                 |
| Dyslipidemia             | 0.42              | 0.10-1.81    | 0.25            |                        |              |                 |
| Radiation dose           | 1.00              | 1.00-1.00    | 0.34            |                        |              |                 |

CAS, carotid artery stenosis; CI, confident interval; HR, hazard ratio.
